# Supplementary material for: Bridging the Digital Gap: A Content Analysis of Mental Health Activities on University Websites
Source: MDPI journal article supplement (doi:10.3390/higheredu2030024), 2023-06-29
Supplement: s1 [file s1]

Archive with 2 entries (2 files):
- Table S1 - Codebook.pdf
- Table S2 - Coded dataset.xlsx
