# Supplementary material for: Bridging the Digital Gap: A Content Analysis of Mental Health Activities on University Websites
Source: MDPI journal article supplement (doi:10.3390/higheredu2030024), 2023-06-29
Supplement: s1 [file s1 › Table S2 - Coded dataset.xlsx]

## Sheet: Sheet1
Coder	ID	Institution	Province or territory	What is the student population?	Institution size?	Access to MH from main landing page?	Mission statement incorporates wellbeing?	Wellbeing framework or strategic plan? (or date latest updated)		If a strategy is present, is it endorsed by senior leadership?	Is there a process to review/create institutional policies with a mental health lens?			Is an evaluation plan for programs and initiatives reported?			Does the wellness centre integrate and acknowledge accommodations and accessibility for psychological challenges/illness?	Are training/education, and/or resources available to improve understanding of mental health and mental illness?			If yes, what actors are these supports offered to?			Is there any evidence of campus-wide anti-stigma activities in the 2022/23 school year? (Use search function)	Are education, training, and/or resources provided to identify and respond to early warning signs in others?			If yes, what actors are these supports provided to?			Opportunities to support students in developing self-management skills and identifying own needs?			Access to ≥1 wellbeing program?	Mode of mental health resources offered?						Indication of institution-community partnership for wellbeing?			Indication of commitment to student-institution engagement or partnership within the wellness centre or well-being framework?	>1 support to address a variety of student needs that impact mental health?	Wellness centre reports tracking of wellbeing/MH outcomes?	Dedicated tabs/sections for for equity-deserving groups?		Does the institution share information about crisis response options?
Initials	#	Name (main campus only)	(main campus only)	#	Small, medium, or large	Yes/No	Yes/No	Yes, date:	No	Yes/No	Yes	Yes, recommended	No	Yes	Yes, recommended	No	Yes/No	Education/training	Resources	Not reported	Staff/facult	Students	Not specified	Yes/No	Education/training	Resources	Not reported	Staff/facult	Students	Not specified	Workshops/presentations	Resources	No	Yes/No	Telephone	Text-based	Email	Internet	In-person	Other	Treatment/services	Education/training	Unclear/No	Yes/No	Yes/No	Yes/No	Yes, specify groups:	No	Yes
JS	65	Concordia University	Quebec	38750	Large	Yes	no		x	N/A		x				x	Yes	unsure - perhaps on intranet	x		x	x		No	x	x		x	x		x	x		Yes	x	x		x	x	x - apps			x	No	Yes	Yes	x - *Not MH specific?* "Community Connections" page Black students, Multi-Faith, Student Parents, International students, Indigenous students, first year		x
AT	11	Queen's University	Ontario	33800	Large	No	No	2020		Yes		x			x		Yes	x	x		x	x		Yes - wellness centre provides staff with stigma training	x	x		x	x		x	x		Yes	x	x		x	x	x - apps; podcasts	x	x		Yes	Yes	Yes	x - 2SLGBTQ+, ethnocultural; experiencing mental health challenges		x
JS	72	Télé-université (Téluq)	Quebec	5180	Medium	yes	no	Unsure -2023 (a policy)		No; unclear			x		x		Yes	x	x		x	x		No	x			x				x		No; unclear	x			x			x - recommended	x - recommended		yes	Yes	No	x - 2slgbtqia+		x
AT	17	University of Alberta	Alberta	43490	Large	No	No	2017		Yes		x			x		No	x	x		x	x		Yes	x	x		x	x		x	x		Yes	x		x		x	x - audio	x	x		Yes	Yes	No	x - Black; Indigenous; international students; sexual violence		x
AT	51	Nipissing University	Ontario	5170	Medium	Yes	No		x	N/A			x			x	No	x	x				x	Yes	x	x				x	x	x		Yes	x	x	x	x		x - app			x	Yes	Yes	No	x - ethnocultural groups; Indigenous; off campus students; international students		x
AT	49	Lakehead University	Ontario	8510	Medium	No	No	2020		No		x			x		No	x	x				x	Yes	x	x				x	x	x		Yes	x	x		x	x		x			Yes	Yes	No	x - ethnocultural groups; LGBTQ+		x
AT	12	University of Waterloo	Ontario	42200	Large	No	No	2021		Yes		x			x		No	x	x		x	x		No - but some articles touch on this	x	x		x	x		x	x		Yes	x	x		x	x	x - apps; videos	x	x		Yes - peer health education	Yes	Yes	x - Indigenous		x
JS	64	Bishop's University	Quebec	2980	Small	No	No		x	N/A			x			x	No	x	x			x		No			x			x	x	x		Yes	x			x	x	x - Campus safety app			x	No	Yes	No	x - Indigenous Student Support Centre; Students experiencing sexual violence		x
JS	33	Mount Allison University	New Brunswick	2410	Small	No	No	est. 2016; Progress report 2018 https://bp-net.ca/wp-content/uploads/2019/04/MountAllison_Progress-Report-on-Student-Affairs-Mental-Health-Strategy_2018.pdf		No		x			x		Yes	x	x		x	x		No	x	x		x	x			x		No	x			x	x	x - apps	x			No	Yes	No	x - Indigenous student support, Black/African students; first-gen students; international		x
JS	77	Université du Québec à Montréal	Quebec	35250	Large	no	no		x	N/A			x			x	Yes	x	x			x		Yes	x				x		x	x		Yes	x	x		x	x			x		No	Yes	No	x - Indigenous students, international students, sexual and gender minorities,		x
JS	87	University of Saskatchewan	Saskatchewan	22390	Large	no	no	2017		Yes		x			x		No	x	x		x	x		No	x	x		x	x		x	x		Yes	x	x		x	x	x - apps		x		No	Yes	No	x - Indigenous students; international students; graduate students		x
AT	6	McMaster University	Ontario	37330	Large	No	No	2013		Yes			x		x		Yes	x	x				x	Yes	x	x		x	x		x	x		Yes	x	x		x	x	x - apps; audio			x	No	Yes	Yes	x - Indigenous students; off-campus; international students; Black students		x
JS	76	Université du Québec à Chicoutimi	Quebec	6390	Medium	no	no		x	N/A			x			x	Yes	x	x			x		No			x				x	x		Yes	x			x	x	x - apps				No	Yes	No	x - Indigenous studentsl international students, students with disabiliites		x
JS	34	St. Thomas University	New Brunswick	1730	Small	No	No		x	N/A			x			x	Yes	x	x		x	x		No			x			x	x	x		Yes	x	x		x	x	x - apps			x	No	Yes	No	x - Indigenous, 2SLGBTQIA+,		x
JS	75	Université du Québec	Quebec	99773	Large	no	no		x	N/A			x			x	Yes	x	x			x		Yes	x	x		x	x		x	x		Yes		x		x	x					yes	Yes	No	x - indigenous, international, parents, and students with disabilities		x
JS	73	Université de Montréal	Quebec	45800	Large	no	no		x	N/A			x			x	Yes		x		x	x		No	x			x (only for specific faculty who take on MH responsibility0			x	x		Yes	x			x	x	x - app			x	No	Yes	No	x - Indigenous, international, students with a disability		x
AT	16	Mount Royal University	Alberta	11620	Large	Yes	No	2021		Yes		x			x		No	x	x		x	x		No	x	x				x	x	x		Yes	x	x		x		x - audio	x	x		No	Yes	No	x - Indigenous, LGBTQ+, sexual violence, addiction, mental health concerns		x
JS	82	Université Laval	Quebec	47690	Large	no	no		x	N/A			x			x	Yes	x	x			x		Yes	x			x			x	x		Yes	x			x	x	x - apps		x		No	Yes	No	x - international students		x
AT	38	Cape Breton University	Nova Scotia	5950	Medium	No	No		x	N/A			x			x	No	x	x				x	No	x	x				x		x		No	x			x	x	x - videos	x	x		No	Yes	No	x - international students; substance use; sexual violence		x
AT	7	University of Guelph	Ontario	31180	Large	No	Yes	2016		No; unclear		x			x		Yes	x	x		x	x		Yes	x	x		x	x		x	x		Yes	x	x		x	x		x	x		No	Yes	Yes	x - LGBTQ+; Black students; racialized students; graduate students		x
AT	63	York University	Ontario	52800	Large	No	No	2022		Yes		x			x		Yes	x	x		x	x		Yes	x	x		x	x		x	x		Yes	x	x		x	x	x - app			x	No	Yes	No	x - LGBTQ+; ethnocultural; domestic violence		x
AT	62	Western University	Ontario	43190	Large	Yes	No	2018		No; unclear		x				x	No	x	x				x	No			x			x	x	x		Yes	x	x			x	x - app	x			Yes	Yes	No	x - LGBTQ+; ethnocultural; international students		x
AT	27	University of Victoria	British Columbia	22060	Large	No	No; none found	Date not reported		No		x			x		No	x	x			x		Yes	x	x		x	x		x	x		Yes	x		x	x	x	x - apps	x			Yes	Yes	No	x - LGBTQ+; Indigenous students		x
AT	9	McGill University	Quebec	36560	Large	No	No	2018		Yes		x		x			Yes	x	x		x	x		Yes	x	x			x		x	x		Yes	x			x	x	x - apps; audio	x	x		No	Yes	No	x - LGBTQ+; Indigenous students		x
AT	10	University of Regina	Saskatchewan	13190	Large	Yes	No		x	N/A			x			x	Yes	x	x		x	x		No	x	x		x	x		x	x		Yes	x	x	x	x	x		x		x	No	No	No	x - LGBTQ+; indigenous students; international students		x
JS	83	Campion College	Saskatchewan	710	Very small	Yes	No		x	N/A			x			x	Yes	x	x		x	x		No	x	x		x	x		x	x		Yes	x	x	x	x	x		x			No	No	No	x - LGBTQ+; indigenous students; international students		x
AT	14	Athabasca University	Alberta	40630	Large	Yes	No		x	N/A			x			x	Yes	x	x				x	No			x			x			x	Yes	x		x	x		x - apps	x	x		Yes	Yes	No	x - LGBTQ+; Indigenous; veterans; health care providers		x
AT	4	Dalhousie University	Nova Scotia	21320	Large	No	No		x	N/A			x			x	Yes	x	x		x	x		Yes	x	x		x	x		x	x		Yes	x	x		x	x		x			No	Yes	No	x - LGBTQ2SIA+; international students		x
JS	90	Concordia University of Edmonton	Alberta	2333	Small	yes	no	2017		No; unclear		x			x		Yes	x	x			x		Yes	x	x		x	x		x	x		Yes	x			x	x			x		No	Yes	No	x - multifaith students		x
JS	89	Yukon University	Yukon	1285	Small	yes	no		x - being developed https://www.yukonu.ca/news/mental-health https://www.yukonu.ca/news/student-wellness	N/A			x			x	No	x	x		x	x		No	x					x	x	x		Yes	x			x	x	x - apps	x - not "treatment" per se, but Indigenous Giving circles	x		No	Yes	No	x - separate first nations support services		x
AT	18	University of Calgary	Alberta	36330	Large	No	No	Date not reported		Yes		x			x		No	x	x		x	x		No	x	x		x	x		x	x		Yes	x			x	x		x	x		Yes	Yes	Yes	x - sexual and gender-based violence, women		x
AT	23	Thompson Rivers University	British Columbia	9188	Medium	Yes	No	2022		Yes			x		x		Yes	x	x				x	No	x	x				x	x	x		Yes	x		x		x	x - app; video; audio		x		Yes	Yes	No	x - sexual violence		x
AT	42	St. Francis Xavier University	Nova Scotia	5440	Medium	Yes	No		x	N/A			x			x	Yes	x	x			x		Yes			x			x	x	x		Yes	x	x			x		x	x		No	Yes	No	x - sexual violence		x
AT	13	Wilfrid Laurier Univeristy	Ontario	22500	Large	No	No		x	N/A			x			x	No	x	x			x		Yes	x	x			x	x	x	x		Yes	x	x		x	x	x - apps	x	x		Yes - peer wellness education	Yes	No	x - sexual violence survivors		x
AT	19	Capilano University	British Columbia	7380	Medium	Yes	No; none found		x	N/A			x			x	Yes			x			x	No			x			x			x	No	x	x		x	x	x - app	x	x		Yes	Yes	No	x - sexual violence survivors; Indigenous		x
AT	15	MacEwan University	Alberta	14690	Large	No	No; none found		x	N/A			x			x	Yes	x	x		x	x		No	x	x		x					x	Yes	x	x	x		x	x - audio			x	Yes	Yes	No	x - sexual violence survivors; mental health concerns		x
AT	56	Trent University	Ontario	12640	Large	Yes	No		x	N/A			x			x	Yes	x	x		x	x		No			x			x	x	x		Yes	x				x		x			Yes	Yes	Yes	x - sexual violence; Indigenous; LGBTQ+; substance use; mental health concerns		x
AT	45	Algoma University	Ontario	4060	Medium	Yes	No; none found		x	N/A			x			x	No	x	x			x		No			x			x		x		Yes	x	x			x	x - app	x	x		No	No	No	x - sexual violence; substance use		x
AT	24	University of British Columbia	British Columbia	70340	Large	No	Yes	Date not reported		Yes		x		x			No	x	x			x		Yes			x			x	x	x		Yes	x			x	x	x - video chat	x	x		Yes	Yes	No	x - substance use		x
AT	47	Carleton University	Ontario	30560	Large	No	No; none found	2022		No		x			x		No	x	x				x	No	x	x				x	x	x		Yes	x	x		x		x - app	x	x		Yes	Yes	No	x - substance use; Indigenous		x
AT	2	Simon Fraser University	British Columbia	30380	Large	No	No	2015		Yes	x			x			Yes	x	x		x	x		Yes	x	x		x	x		x	x		Yes	x	x		x	x	x - app; audio	x		x	Yes	Yes	Yes	x - graduate students; South Asian; LGBTQIA2S+; Indigenous; Black; individuals with disabilities; international students		x
AT	8	University of Prince Edward Island	Prince Edward Island	5540	Medium	Yes	No	2019		Yes		x			x		No	x	x		x			Yes	x	x		x			x	x		Yes	x		x		x		x			No	Yes	No	x - LGBTQ+; international students; students with ADHD		x
JS	36	University of New Brunswick	New Brunswick	10030	Large	No	No		x - committment to the Canadian standard but no strategy to implement? https://blogs.unb.ca/newsroom/2021/05/unb-aligns-with-national-standard-of-mental-health-and-well-being-for-post-secondary-students.php	N/A			x			x	Yes		x				x	No	x	x		x	x		x	x		Yes	x	x		x					x	No	No; unclear	No	x - Designated people for LGBTQ2S+, Indigenous Counselling		x
JS	37	Acadia University	Nova Scotia	4480	Medium	No	No		x	N/A			x			x	Yes		x		x	x		Yes	x	x		x	x			x		Yes	x	x		x	x	apps		x		No	Yes	No	x - LGBQ+ resources; students who have experienced abuse, and substance use; men		x
JS	40	NSCAD University	Nova Scotia	840	Very small	Yes	No		x	N/A			x			x	Yes		x		x	x		No		x		x			x	x		Yes	x	x		x	x	apps - external and their own			x	No	Yes	No		x	x
JS	41	Saint Mary's University	Nova Scotia	6430	Medium	No	no	Healthy Campus Strategy (2019); Health and Wellness Strategy (2011)		No; unclear		x				x	No		x		x	x		No	x	x		x	x		x	x		No; unclear	x	x		x	x				x; recommended - unclear to what extent	No	Yes	No		x	x
JS	35	Université de Moncton	New Brunswick	5500	Medium	No	No		x	N/A			x			x	Yes		x			x		Yes		x		x			x	x		No; unclear	x	x	x	x	x	App - SSP	x			No	Yes	No		x	x
AT	53	Ontario Tech University	Ontario	11050	Large	Yes	Yes		x	N/A			x			x	Yes	x	x			x		Yes			x			x	x	x		Yes	x	x	x	x	x	x - app	x	x		Yes	Yes	No		x	x
AT	39	Mount Saint Vincent University	Nova Scotia	3880	Medium	No	No		x	N/A			x			x	No	x	x		x	x		No	x	x		x	x		x	x		Yes	x	x		x	x	x - app	x	x		Yes	Yes	No		x	x
AT	55	Toronto Metropolitan University	Ontario	47870	Large	Yes	No	2018		No		x			x		Yes	x	x		x	x		Yes	x	x		x	x		x	x		Yes	x	x		x	x	x - app	x			Yes	Yes	Yes		x	x
AT	29	Brandon University	Manitoba	2980	Small	No	No		x	N/A			x			x	No		x			x		No		x				x		x		No	x			x	x	x - app	x	x		Yes	Yes	No		x	x
AT	46	Brock University	Ontario	19620	Large	No	Yes		x	N/A			x			x	Yes	x	x				x	Yes	x	x				x	x	x		Yes	x	x			x	x - app	x			No	Yes	No		x	x
AT	44	University of King's College	Nova Scotia	970	Very small	No	No; none found		x	N/A			x			x	No	x	x			x		Yes	x	x				x			x	Yes	x				x	x - app	x	x		Yes	No	No		x	x
AT	52	OCAD University	Ontario	4990	Medium	Yes	No	2013		No			x			x	No		x			x		No		x		x	x			x		Yes	x	x	x	x		x - app	x			Yes	Yes	No		x	x
JS	71	Institut national de la recherche scientifique	Quebec	630	Very small	yes	no		x	N/A			x			x	No		x			x		No			x			x		x		No; unclear	x		x	x		x - app			x	No	Yes	No		x	x
AT	50	Laurentian University	Ontario	7790	Medium	Yes	No; none found		x	N/A			x			x	Yes	x	x				x	No		x				x			x	Yes	x	x	x			x - app			x	No	Yes	No		x	x
JS	69	École Polytechnique de Montréal	Quebec	9880	Medium	no	no		x	N/A			x			x	Yes		x		x	x		Yes		x		x	x		x	x		Yes	x			x	x	x - app https://www.aseq.ca/rte/fr/%C3%89colePolytechniqueAEP1ercycle_Programmedaide_Programmedaide	x	x		No	Yes	No		x	x
AT	59	University of Ottawa	Ontario	48800	Large	Yes	No	2020		Yes		x			x		No	x	x		x	x		No	x	x		x	x		x	x		Yes	x	x	x	x	x	x - app; podcast	x	x		Yes	Yes	Yes		x	x
AT	3	Memorial University of Newfoundland	Newfoundland and Labrador	18910	Large	No	No		x	N/A			x			x	Yes	x	x		x			No	x	x		x			x	x		Yes	x	x		x	x	x - app; print			x	No	No	No		x	x
AT	61	University of Windsor	Ontario	17610	Large	No	No	2021		Yes		x		x			No	x	x		x	x		No	x	x		x	x		x	x		Yes	x	x		x	x	x - app; video	x	x		Yes	Yes	Yes		x	x
JS	74	Université de Sherbrooke	Quebec	25310	Large	no	no		x	N/A			x			x	Yes	x	x			x		No		x		x			x	x		Yes	x			x	x	x - apps			x	No	Yes	No		x	x
JS	81	Université du Québec en Outaouais	Quebec	6440	Medium	yes	no		x	N/A			x			x	Yes		x		x	x		No	x - for specific "sentinels"				x		x	x		Yes	x			x	x	x - apps		x		yes	Yes	No		x	x
JS	79	Université du Québec à Trois-Rivières	Quebec	14740	Large	no	no		x	N/A			x			x	No		x			x		No		x			x		x	x		Yes	x			x	x	x - apps	x			No	Yes	No		x	x
AT	25	University of Northern British Columbia	British Columbia	3310	Medium	No	No		x	N/A			x			x	No			x			x	No			x			x			x	No	x		x		x	x - apps	x	x		No	No	No		x	x
AT	22	Royal Roads University	British Columbia	3220	Medium	Yes	No; none found	2019		No		x				x	Yes	x	x				x	No			x			x	x	x		Yes	x	x		x	x	x - videos		x		No	Yes	No		x	x
JS	66	École de technologie supérieure	Quebec	8840	Medium	No	No		x	N/A			x			x	No	x	x			x		No			x			x	x	x		Yes	x			x	x	x - videos, podcasts			x	No	Yes	No		x	x
AT	1	University of Lethbridge	Alberta	8270	Medium	No	No		x	N/A			x			x	Yes	x			x	x		No	x	x		x	x		x	x		Yes	x	x	x	x	x	x -app	x	x		No	Yes	No		x	x
AT	21	Kwantlen Polytechnic University	British Columbia	14259	Large	No	No	2018 (not accessible)		No		x				x	No	x	x				x	Yes	x	x				x	x	x		Yes	x		x	x		x -app			x	Yes	Yes	No		x	x
AT	28	Vancouver Island University	British Columbia	7150	Medium	Yes	No		x	N/A			x			x	No	x	x		x	x		Yes	x	x		x	x		x	x		Yes	x	x	x	x	x				x	No	Yes	No		x	x
AT	60	University of Toronto	Ontario	97400	Large	No	No	2019		Yes		x			x		No	x	x		x	x		No	x	x		x	x		x	x		Yes	x	x		x	x		x	x		Yes	Yes	Yes		x	x
JS	43	Université Sainte-Anne	Nova Scotia	630	Very small	Yes	No		x	N/A			x			x	No		x			x		No		x			x			x		No; unclear	x	x		x	x				x	No	No; unclear	No		x	x
JS	67	École des Hautes Études Commerciales de Montréal	Quebec	13480	Large	No	no		x	N/A			x			x	No		x		x			Yes	x	x			x		x	x		No; unclear	x	x		x	x		x			No	Yes	No		x	x
JS	30	Université de Saint-Boniface	Manitoba	930	Very small	Yes	No		x	N/A			x			x	Yes			x				No		x			x		x	x		No	x	x		x	x				x	No	No	No		x	x
AT	5	University of Winnipeg	Manitoba	10550	Large	Yes	No		x	N/A			x			x	Yes	x	x		x	x		No	x	x				x	x	x		Yes	x			x	x		x			No	No	No		x	x
JS	86	Luther College	Saskatchewan	530	Very small	no	no		x	N/A			x			x	No	x	x		x	x		No	x	x					x	x		No; unclear	x			x	x		x			No	No	No		x	x
AT	32	University of Manitoba	Manitoba	30370	Large	No	Yes	2014		No			x	x			No	x	x				x	No	x	x				x	x	x		Yes	x				x		x	x		No	Yes	No		x	x
AT	26	University of the Fraser Valley	British Columbia	9270	Medium	No	No		x	N/A			x			x	Yes			x			x	No			x			x	x	x		No	x				x		x	x		No	Yes	No		x	x
AT	54	Royal Military College of Canada	Ontario	2660	Small	Yes	No		x	N/A			x			x	No			x			x	No			x			x			x	No	x				x				x	No	No	No		x	x
JS	31	University College of the North	Manitoba	2400	Small	No	No		x	N/A			x			x	No	x			x	x		No	x			x	x		x			Yes	x				x		x	x		No	No	No		x
JS	84	First Nations University of Canada	Saskatchewan	1200	Small	yes	no		x	N/A			x			x	No		x				x	Yes			x					x		No; unclear					x				x	No	Yes	No		x
JS	80	Université du Québec en Abitibi-Témiscamingue	Quebec	5250	Medium	no	no		x	N/A			x			x	Yes			x				No			x						x	No; unclear					x				x	No	No; unclear	No		x
AT	20	Emily Carr University of Art and Design	British Columbia	2092	Small	No	No		x	N/A			x			x	Yes			x			x	No			x			x			x	Yes	x		x	x			x	x		Yes	Yes	No		x	x
JS	57	Université de Hearst	Ontario	280	Very small	Yes	No		x	N/A			x			x	Yes		x			x		No	x	x				x	x	x		Yes	x	x		x			x	x		No	Yes	No		x	x
JS	68	École nationale d'administration publique	Quebec	2000	Small	yes	no		x	N/A			x			x	No			x				No			x						x	No; unclear	x		x						x	No	Yes	No		x	x
JS	58	Université de l'Ontario Français	Ontario	151	Very small	No	No		x	N/A			x			x	No			x			x	No			x			x			x	No									x	No	No	No		x
JS	70	Institut de tourisme et d'hôtellerie du Québec	Quebec	8700	Medium	no	no		x	N/A			x			x	No			x			x	No			x			x			x	No									x	No	No	No		x
AT	48	Dominican University College	Ontario	244	Very small	No	No; none found		x	N/A			x			x	No			x			x	No			x			x			x	No									x	No	No	No		x
JS	88	St. Thomas More College	Saskatchewan	1120	Small	no	no	2017 *assuming U Sask applies here too but this is unclear (e.g., no college staff are listed on the wellness strategy for USask(		Yes			x			x	No			x			x	No			x					x		No; unclear									x	No	No	No		x
JS	85	La Cité universitaire francophone	Saskatchewan	Not reported	Not reported	no	no		x	N/A			x			x	No			x				No			x						x	No									x	No	No	No		x
JS	78	Université du Québec à Rimouski	Quebec	6560	Medium	yes	no		x	N/A			x			x	Yes			x				No	x					x	x			Yes				x	x			x		No	Yes	No		x
[truncated: 3 more columns]
